# Supplementary material
Source: PubMed Central journal article supplement (PMC5862786)
Supplement: NIHMS944728-supplement.pdf [file NIHMS944728-supplement.pdf]

1  
2  
3  
4 **Supplementary Material:**  
5

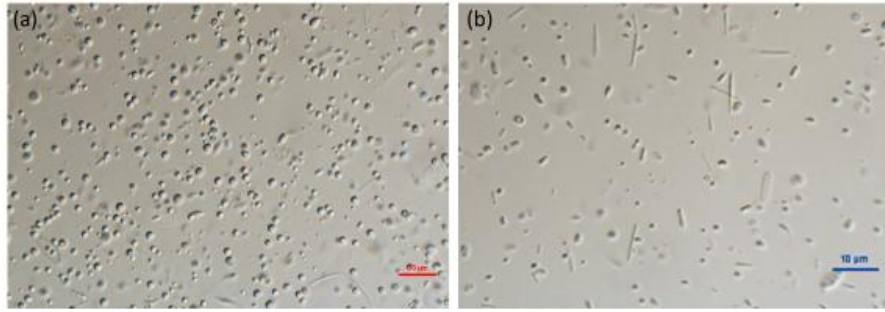

16 **Fig. S1.** The bright field images demonstrating the yield difference for (a) one step and (b) two-step fabrications with 6.0% PVA as the second step surfactant concentration. Scale bars are 10 µm, the first step PVA concentration and stir rate are fixed at 1.0% and 5500 rpm while 1.8 mg/ml PLGA in chloroform and 2.0% sodium tripolyphosphate are used as the oil phase and surface-active molecule.  
17  
18  
19  
20  
21  
22  
23  
24

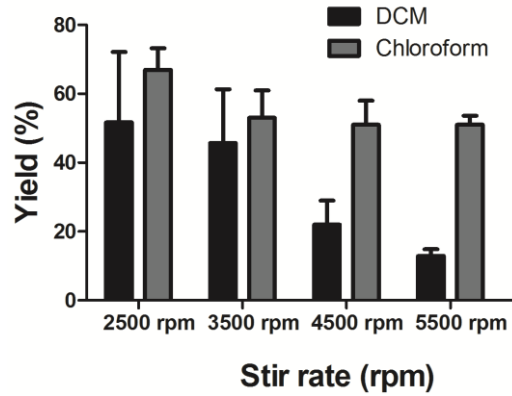

39 **Figure S2.** Fabrication yield as a function of the choice of oil phase solvent choice (2.0% sodium tripolyphosphate is used as the surface-active molecule, first and second step PVA concentrations are fixed at 1.0% and 6.0%, and PLGA concentration in the oil phase is fixed at 1.8 mg/ml).  
40  
41  
42  
43  
44  
45  
46

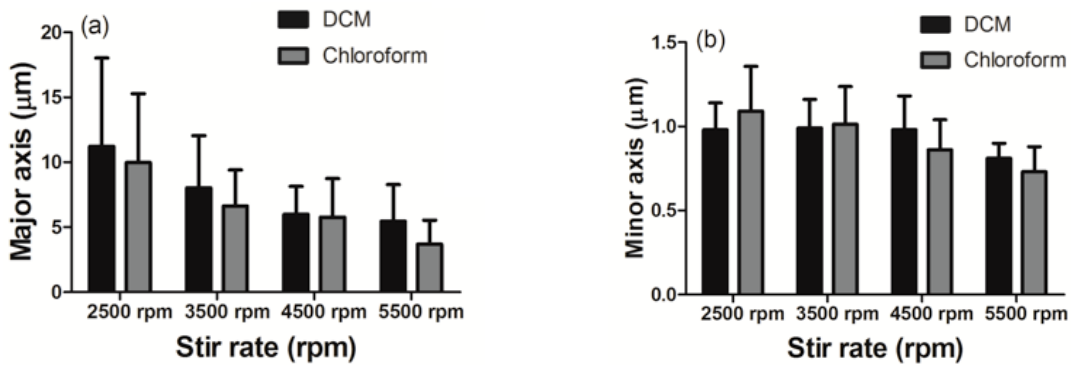

1  
2  
3  
4  
5  
6  
7  
8  
9  
10  
11  
12  
13  
14  
15  
16  
17  
18  
19  
20  
21  
22  
23  
24  
25  
26  
27  
28  
29  
30  
31  
32  
33  
34  
35  
36  
37  
38  
39  
40  
41  
42  
43  
44  
45  
46  
47  
48  
49  
50  
51  
52  
53  
54  
55  
56  
57  
58  
59  
60  
61  
62  
63  
64  
65

**Fig. S3.** (a) Major axis and (b) minor axis size as a function of the choice of oil phase solvent choice (2.0% sodium tripolyphosphate is used as the surface-active molecule, first and second step PVA concentrations are fixed at 1.0% and 6.0% and PLGA concentration in the oil phase is fixed at 1.8 mg/ml)

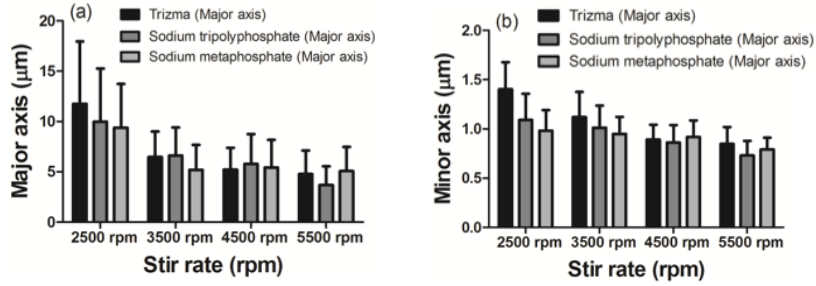

**Fig. S4.** (a) Major axis and (b) minor axis size as a function of the surface-active molecule choice (1.8 mg/ml PLGA in chloroform is used as the oil phase, first and second step PVA concentrations are fixed at 1.0% and 6.0%)
